# Supplementary material for: Chimeric polymers formed from a monomer capable of free radical, oxidative and electrochemical polymerisation
Source: Royal Society of Chemistry journal article supplement (doi:10.1039/b821409c), 2009-01-01

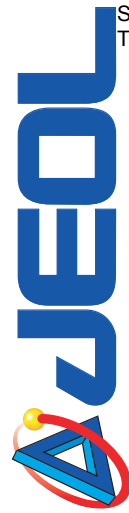

```

Filename = N-phenylethylene_diam
Author = delta
Experiment = single_pulse.ex2
Sample_id = N-phenylethylene_diam
Solvent = CHLOROFORM-D
Creation_time = 12-JUN-2007 18:30:01
Revision_time = 28-NOV-2008 12:35:09
Current_time = 28-NOV-2008 12:38:12

Comment = N-phenylethylene_diam
Data_format = 1D_COMPLEX
Dim_size = 26214
Dim_title = 1H
Dim_units = [ppm]
Dimensions = X
Site = ECX400
Spectrometer = DELTA2_NMR

Field_strength = 9.389766[T] (400[MHz])
X_acq_duration = 4.36207616[s]
X_domain = 1H
X_freq = 399.78219838[MHz]
X_offset = 5[ppm]
X_points = 32768
X_prescans = 0
X_resolution = 0.22924863[Hz]
X_sweep = 7.51201923[kHz]
Irr_domain = 1H
Irr_freq = 399.78219838[MHz]
Irr_offset = 5[ppm]
Tri_domain = 1H
Tri_freq = 399.78219838[MHz]
Tri_offset = 5[ppm]
Clipped = FALSE
Mod_return = 1
Scans = 16
Total_scans = 16

X_90_width = 10.8[us]
X_acq_time = 4.36207616[s]
X_angle = 30[deg]
X_atn = 7[dB]
X_pulse = 3.6[us]
Irr_mode = Off
Tri_mode = Off
Dante_attenuator = 40[dB]
Dante_interval = 0.1[ms]
Dante_loop = 98
Dante_preset = TRUE
Dante_pulse = 2[us]
Delay = 0[us]
Initial_wait = 1[s]
Preset_time = 0.115[ms]
Recvr_gain = 34
Relaxation_delay = 1[s]
Repetition_time = 5.36207616[s]
Temp_get = 18[degC]

Probe_id = 2692
Lock_gain = 25
Lock_level = 180
Lock_strength = 1009.0

Hf_tune_dial = 2489
Hf_match_dial = 3935
Lf_tune_dial = 2624
    
```

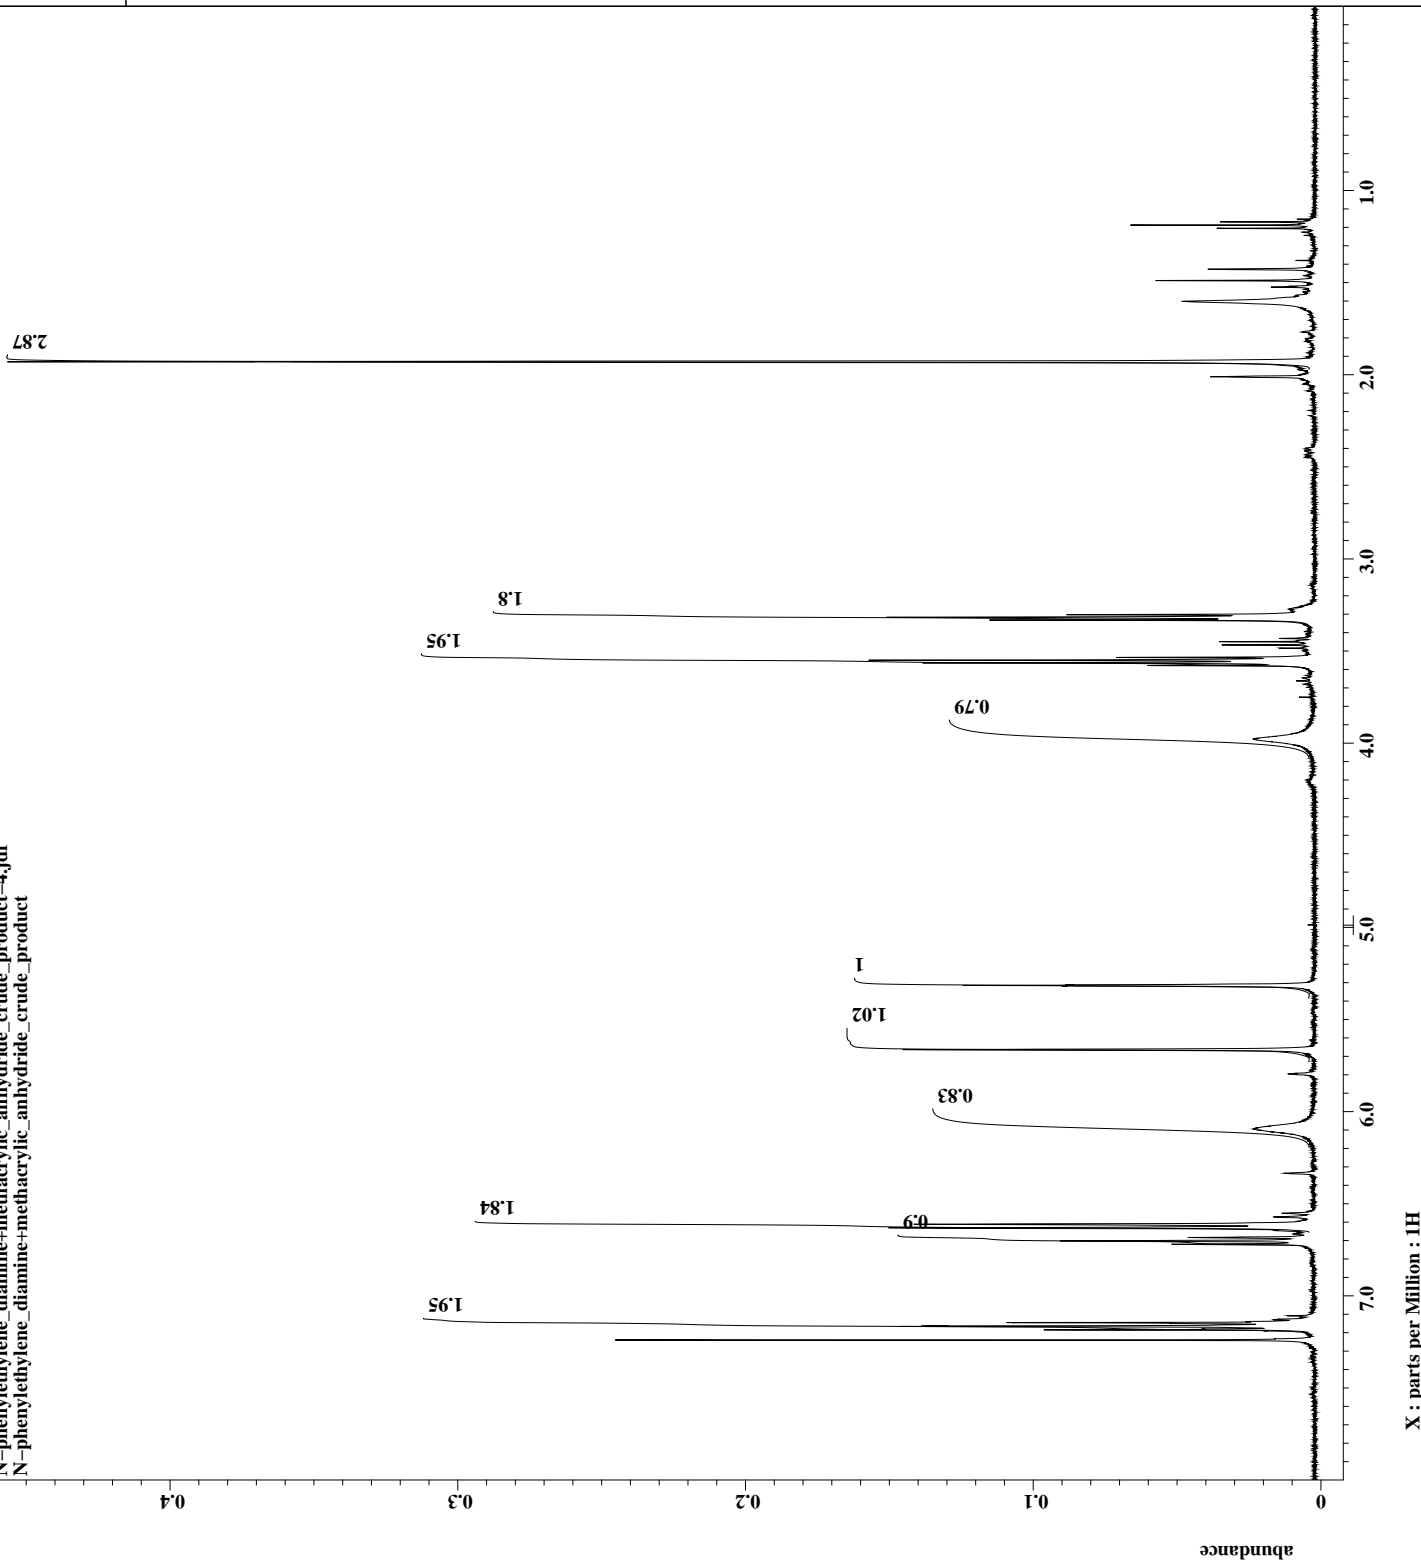

Supplement: b821409c2.pdf [file b821409c2.pdf]
