# Supplementary material for: Chimeric polymers formed from a monomer capable of free radical, oxidative and electrochemical polymerisation
Source: Royal Society of Chemistry journal article supplement (doi:10.1039/b821409c), 2009-01-01
Supplement: b821409c3.pdf [file b821409c3.pdf]

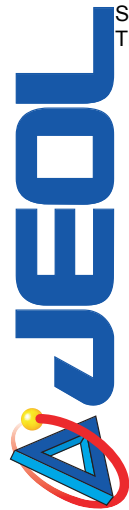

N-phenylethylenediamine+methacrylic\_anhydride\_crude\_product\_13C-3.jdf  
N-phenylethylenediamine+methacrylic\_anhydride\_crude\_product\_13C

Filename = N-phenylethylenediamine  
Author = delta  
Experiment = single\_pulse\_dec  
Sample\_id = N-phenylethylenediamine  
Solvent = CHLOROFORM-D  
Creation\_time = 12-JUN-2007 19:04:54  
Revision\_time = 28-NOV-2008 12:36:24  
Current\_time = 28-NOV-2008 12:37:40  
Comment = N-phenylethylenediamine  
Data\_format = 1D\_COMPLEX  
Dim\_size = 26214  
Dim\_title = 13C  
Dim\_units = [ppm]  
Dimensions = X  
Site = ECX400  
Spectrometer = DELTA2\_NMR  
Field\_strength = 9.389766[T] (400[MHz])  
X\_acq\_duration = 1.04333312[s]  
X\_domain = 13C  
X\_freq = 100.52530333[MHz]  
X\_offset = 100[ppm]  
X\_points = 32768  
X\_prescans = 0  
X\_resolution = 0.95846665[Hz]  
X\_sweep = 31.40703518[kHz]  
Irr\_domain = 1H  
Irr\_freq = 399.78219838[MHz]  
Irr\_offset = 5[ppm]  
Clipped = TRUE  
Mod\_return = 1  
Scans = 965  
Total\_scans = 965  
X\_90\_width = 9.7[us]  
X\_acq\_time = 1.04333312[s]  
X\_angle = 30[deg]  
X\_atn = 10[db]  
X\_pulse = 3.23333333[us]  
Irr\_atn\_dec = 27.55[db]  
Irr\_atn\_noe = 27.55[db]  
Irr\_noise = WALTZ  
Decoupling = TRUE  
Delay = 0[us]  
Initial\_wait = 1[s]  
Irr\_pwidth = 0.115[ms]  
Noe\_time = TRUE  
Noe\_time = 1[s]  
Recvr\_gain = 50  
Relaxation\_delay = 1[s]  
Repetition\_time = 2.04333312[s]  
Temp\_get = 18.5[dc]  
Probe\_id = 2692  
Lock\_gain = 25  
Lock\_level = 180  
Lock\_strength = 1021.0  
Hf\_tune\_dial = 2489  
Hf\_match\_dial = 3919  
Lf\_tune\_dial = 2625  
Lf\_match\_dial = 3490  
Shim\_z1 = -3685  
Shim\_z2 = -149  
Shim\_z3 = -93

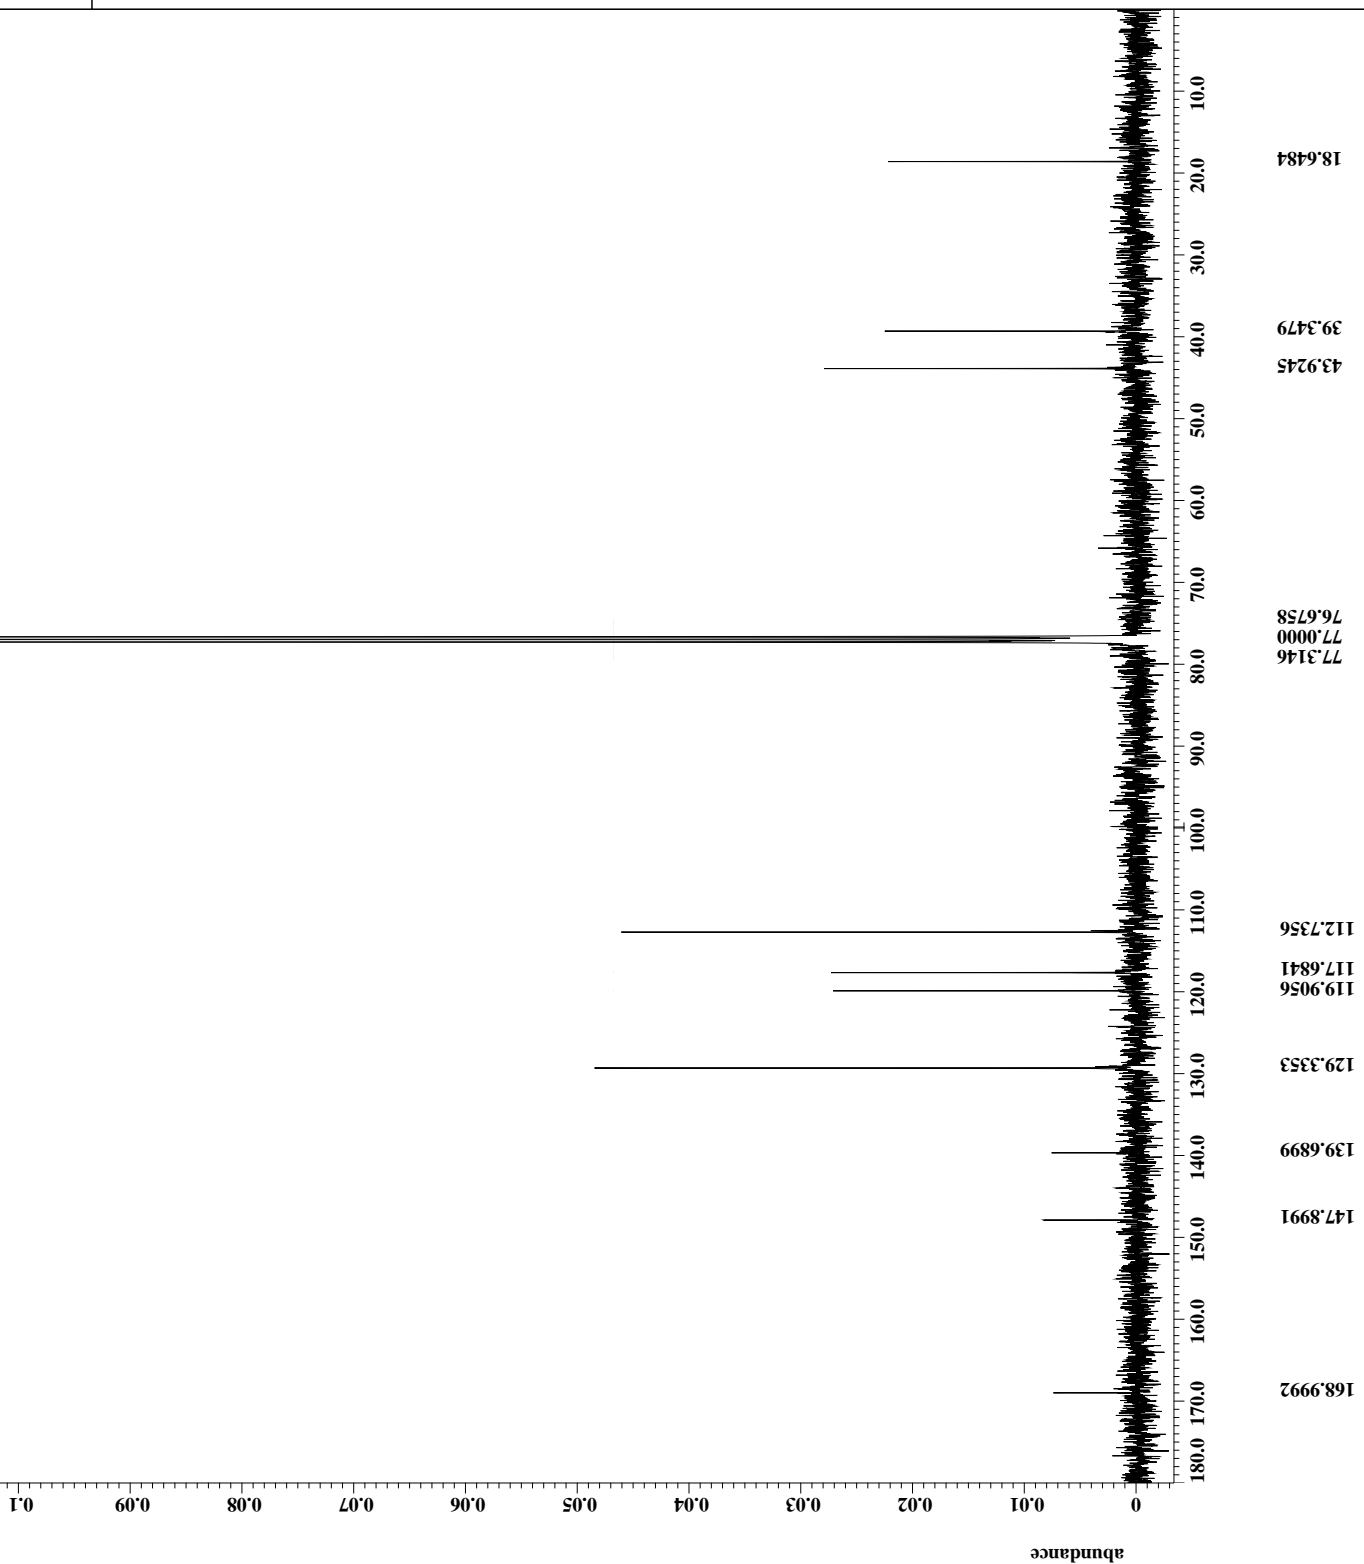

X : parts per Million : 13C
